# Supplementary material for: Influence of Genotypic and Environmental Factors on Tobacco Leaves Based on Metabolomics
Source: MDPI journal article supplement (doi:10.3390/life12040590), 2022-04-15
Supplement: s1 [file s1]

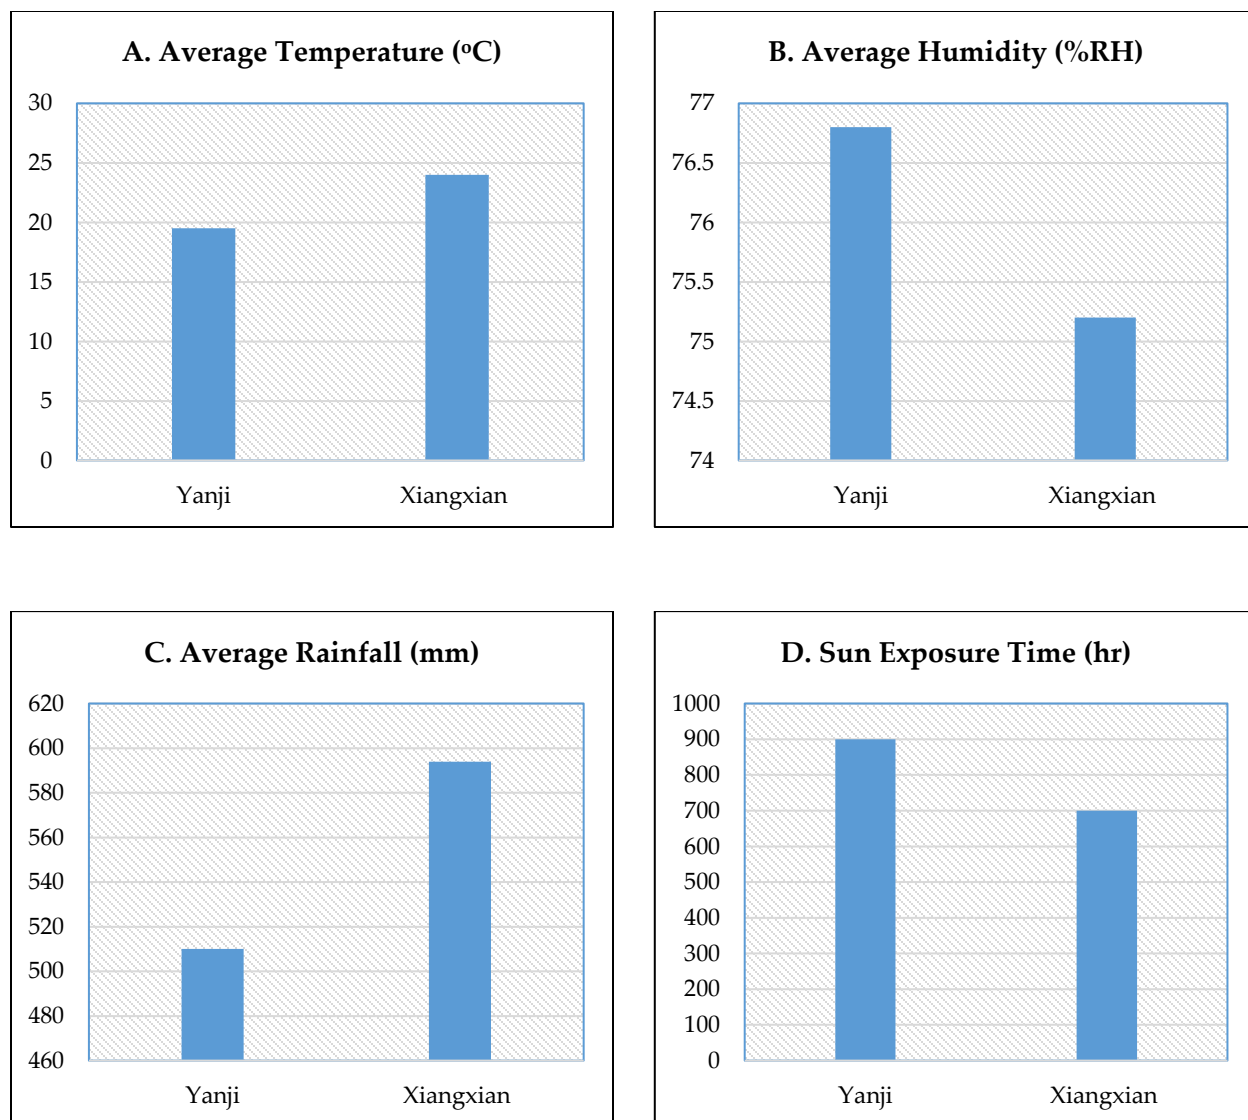

**Figure S1.** Shows the recorded meteorological conditions for Yanji and Xiangxian regions: A. Average temperature (°C); B. Average humidity (%RH); C. Average rainfall (mm); and D. Sun exposure time (hr), during current study (from May to October, 2015).
